# Supplementary material for: NADPH oxidase promotes Parkinsonian phenotypes by impairing autophagic flux in an mTORC1-independent fashion in a cellular model of Parkinson’s disease
Source: PubMed Central journal article supplement (PMC4785399; doi:10.1038/srep22866), 2016-03-10

## Supplementary materials

NADPH oxidase promotes Parkinsonian phenotypes by impairing autophagic flux in an mTORC1-independent fashion in a cellular model of Parkinson's disease

Rituraj Pal<sup>1</sup>, Lakshya Bajaj<sup>2</sup>, Jaiprakash Sharma<sup>2</sup>, Michela Palmieri<sup>2</sup>, Alberto Di Ronza<sup>2</sup>, Parisa Lotfi<sup>2</sup>, Arindam Chaudhury<sup>1</sup>, Joel Neilson<sup>1</sup>, Marco Sardiello<sup>2</sup> and George G. Rodney<sup>1\*</sup>

<sup>1</sup>Department of Molecular Physiology and Biophysics, Baylor College of Medicine, Houston, United States.

<sup>2</sup>Department of Molecular and Human Genetics, Baylor College of Medicine, Houston, United States.

\*To whom correspondence should be addressed.  
Dr. George G. Rodney. Email: rodney@bcm.edu

## Supplementary figure legends

**Supplementary Figure S1. (a)** SHSY-5Y cells were treated or untreated with 0.5  $\mu$ M rotenone for 6 h.

Some cells were preincubated with 5  $\mu$ M gp91 ds for 1 h followed by 6 hour of rotenone treatment. As control, some cells were treated with 5  $\mu$ M gp91 ds for 7 h or hydrogen peroxide ( $H_2O_2$ , 200  $\mu$ M) for 15 min. ROS generation was measured by monitoring DCF-DA fluorescence intensity. DCF fluorescence is represented in RGB color scale using imageJ. **(b)** MTT assay was performed to measure cell-survivability in cells treated as **(a)**. Bar diagram indicates quantitative analysis of at least 3 biological replicates.

Results are represented as means of SE (SEM). <sup>\*,#</sup>p <0.05 versus all groups, unless otherwise indicated. N.S. indicates non-significant. **(c)** SHSY-5Y cells were treated or untreated with 0.5  $\mu$ M rotenone for 6 h.

Some cells were preincubated with 5  $\mu$ M gp91 ds for 1 h or 5 mM NAC for 2 h followed by 6 hour of rotenone treatment. DMSO was used as control (vehicle). Cell lysates were analyzed by immunoblotting with antibodies as indicated. GAPDH was used as a loading control.

**Supplementary Figure S2. (a)** SHSY-5Y cells were treated or untreated with 0.5  $\mu$ M rotenone for 24 h. Some cells were preincubated with 5  $\mu$ M gp91 ds for 1 h followed by 6 hour of rotenone treatment. As control, some cells were treated with 5  $\mu$ M gp91 ds for 25 h. Cells were labelled with endogenous beta-actin (green) and cathepsin D (red) for immunofluorescence. Representative cells are shown. The punctate structures indicate lysosomal localization of cathepsin D. Nucleus was labeled with DAPI (blue). **(b)** Cells were transfected with GFP-RFP-LC3 construct and incubated for 24 h, followed by treatment as indicated in **(a)**. Live cell imaging was performed using confocal microscope. Bafilomycin was used as a positive control of autophagic flux blocker. Representative cells are shown where yellow pixels indicate colocalization of GFP and RFP in the merged images. Nucleus is indicated with DAPI (blue) staining. **(c)** MTT assay was performed to measure cell-survivability in cells treated as **(a)**. DMSO was used as a control (vehicle).

Bar diagrams indicate quantitative analysis of at least 3 biological replicates. Results are represented as means of SE (SEM). N.S. indicates non-significant.

**Supplementary Figure S3.** (a) SHSY-5Y cells were treated or untreated with 10  $\mu$ M rotenone for 24 h. Some cells were preincubated with 5  $\mu$ M gp91 ds for 1 h followed by 24 hour of rotenone treatment. As control, some cells were treated with 5  $\mu$ M gp91 ds for 25 h or hydrogen peroxide ( $H_2O_2$ , 200  $\mu$ M) for 15 min. ROS generation was measured by monitoring DCF fluorescence intensity. DCF fluorescence is represented in RGB color scale using imageJ. (b) Lysates from cells treated as in (a) were analyzed by using immunoblot assay with the antibodies as indicated. (c) MTT assay was performed to measure cell-survivability in cells treated as (a). DMSO was used as a control (vehicle).

GAPDH was detected as a loading control for all immunoblots. Bar diagrams indicate quantitative analysis of at least 3 biological replicates. Results are represented as means of SE (SEM). \* $p < 0.05$  versus all groups, unless otherwise indicated. N.S. indicates non-significant.

## Supplementary tables

### Table ST1.

#### Sequences of oligos used in real-time qPCR analysis.

| Gene name | Forward oligos       | Reverse oligos         |
|-----------|----------------------|------------------------|
| GAPDH     | TGCACCACCAACTGCTTAGC | GGCATGGACTGTGGTCATGAG  |
| SQSTM1    | AAGCTGCCTTGTACCCAC   | CGCTCCGATGTCATAGTTCTTG |
| MAP1LC3B  | AGCAGCATCCAACCAAAATC | CTGTGTCCGTTCAACCAACAG  |

**Table ST2.****Antibodies**

| <b>NAME</b>              | <b>COMPANY</b>           | <b>DILUTION</b> |
|--------------------------|--------------------------|-----------------|
| LAMP1                    | Cell signaling           | 1:1000          |
| LAMP2                    | Santa Cruz Biotechnology | 1:1000          |
| P62                      | BD Bioscience            | 1:1000          |
| LC3 (Immunofluorescence) | Novus Biologicals        | 1:100           |
| LC3 (Immunoblot)         | Cell signaling           | 1:1000          |
| GAPDH                    | Millipore                | 1:2000          |
| P-Src                    | Cell signaling           | 1:500           |
| T-Src                    | Cell signaling           | 1:1000          |
| P-PI3K                   | Cell signaling           | 1:300           |
| T-PI3K                   | Cell signaling           | 1:500           |
| P-Akt                    | Cell signaling           | 1:500           |
| T-Akt                    | Cell signaling           | 1:1000          |
| P-mTOR                   | Cell signaling           | 1:500           |
| T-mTOR (Immunoblot)      | Cell signaling           | 1:1000          |

|                                    |                  |        |
|------------------------------------|------------------|--------|
| T-mTOR (Immunofluorescence)        | Cell signaling   | 1:50   |
| P-ULK1                             | Cell signaling   | 1:1000 |
| T-ULK1                             | Cell signaling   | 1:1000 |
| P-S6K                              | Cell signaling   | 1:300  |
| T-S6K                              | Cell signaling   | 1:1000 |
| P-4E-BP1                           | Cell signaling   | 1:1000 |
| T-4E-BP1                           | Cell signaling   | 1:1000 |
| P-S6 (S235/236)                    | Cell signaling   | 1:1000 |
| P-S6 (S240/244)                    | Cell signaling   | 1:1000 |
| T-S6                               | Cell signaling   | 1:2000 |
| P-Beclin1                          | PhosphoSolutions | 1:50   |
| T-Beclin1                          | Cell signaling   | 1:1000 |
| P-AMPK                             | Cell signaling   | 1:500  |
| T-AMPK                             | Cell signaling   | 1:1000 |
| VPS34                              | Invitrogen       | 1:300  |
| Beta-actin<br>(Immunofluorescence) | Cell signaling   | 1: 200 |

|                   |                          |        |
|-------------------|--------------------------|--------|
| Cathepsin D       | Santa Cruz Biotechnology | 1:100  |
| PARP-1            | Cell signaling           | 1:500  |
| Total caspase-3   | Cell signaling           | 1:1000 |
| Cleaved caspase-3 | Cell signaling           | 1:100  |

(a)

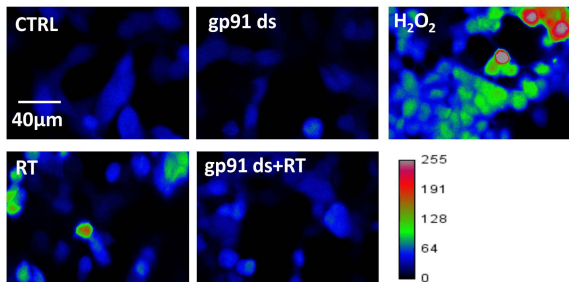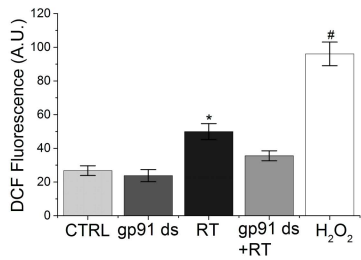

(b)

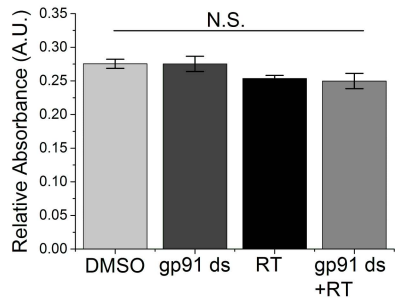

(c)

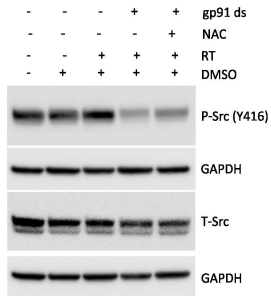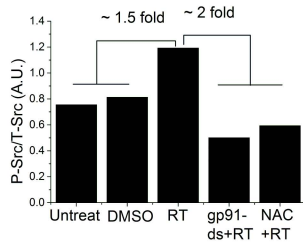

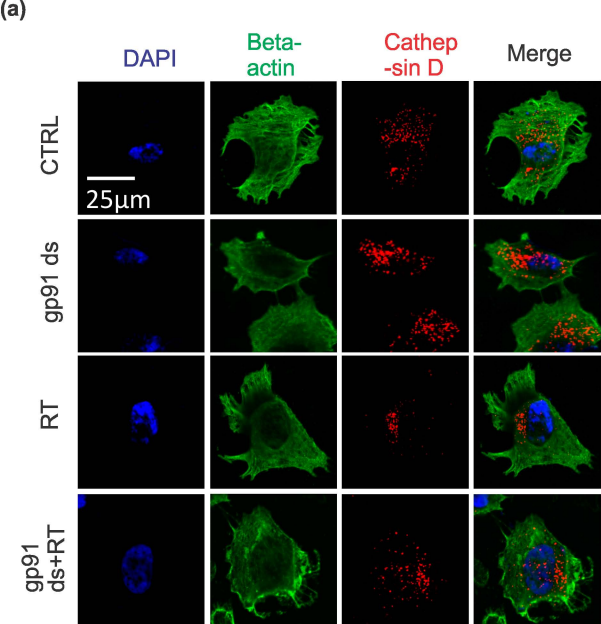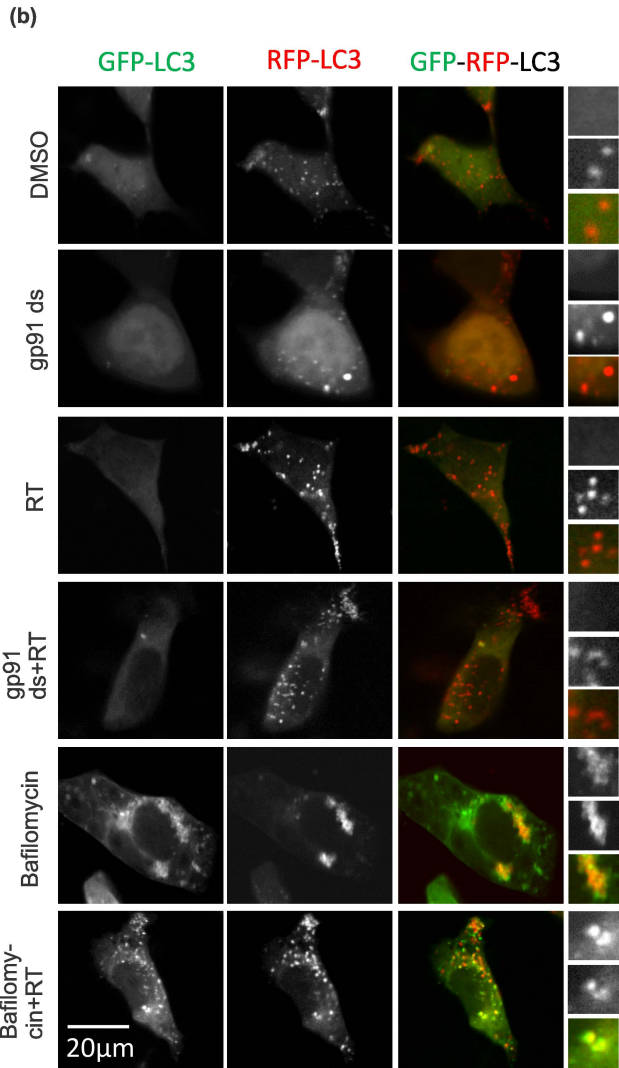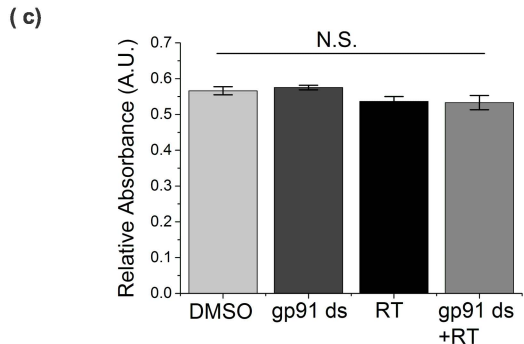



(a)

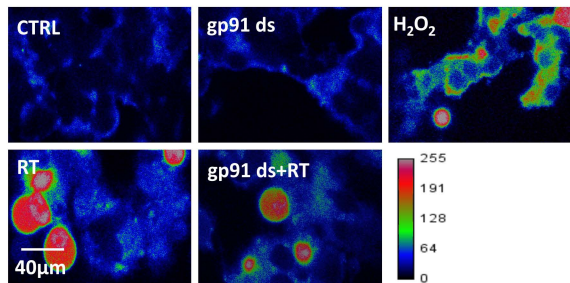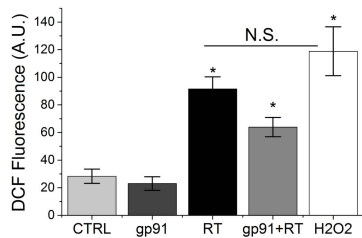

(b)

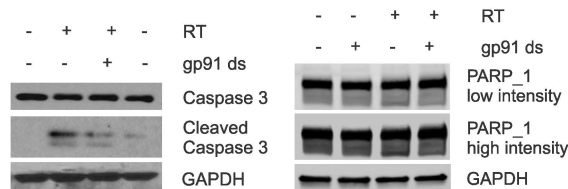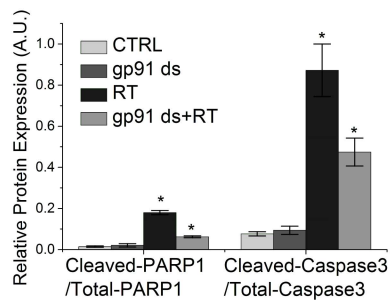

(c)

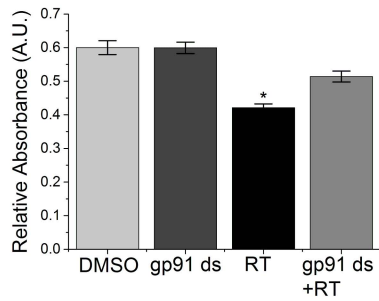

Supplement: srep22866-s1.pdf [file srep22866-s1.pdf]
